# Supplementary material for: Efficient synthesis of zirconium poly(styrene-phenylvinylphosphonate)phosphate-supported proline as a recyclable catalyst for direct asymmetric aldol reactions in water
Source: Royal Society of Chemistry journal article supplement (doi:10.1039/c4ra11208c), 2014-12-04
Supplement: c4ra11208c1.pdf [file c4ra11208c1.pdf]

# Supporting Information

## Efficient synthesis of zirconium poly(styrene- phenylvinylphosphonate)phosphate-supported proline as a recyclable catalyst for direct asymmetric aldol reactions in water

Chuanlong Wu<sup>a\*</sup>, Xiaoqing Long<sup>a</sup>, Xiangkai Fu<sup>b</sup>, Guangwei Wang<sup>c\*</sup>, Zakaria. A. Mirza<sup>c</sup>

<sup>a</sup>Chongqing Unis Chemical Co, Ltd, National Enterprise Technology Center, Chongqing, 402161, PR China

<sup>b</sup>College of Chemistry and Chemical Engineering Southwest University, Chongqing, 400715, PR China

<sup>c</sup>Chongqing Institute of Green and Intelligent Technology (CIGIT), Chinese Academy of Sciences, Chongqing, 400714, PR China

Tel: +86 2368253704; fax: +86 2368254000

E-mail: wcl110@swu.edu.cn

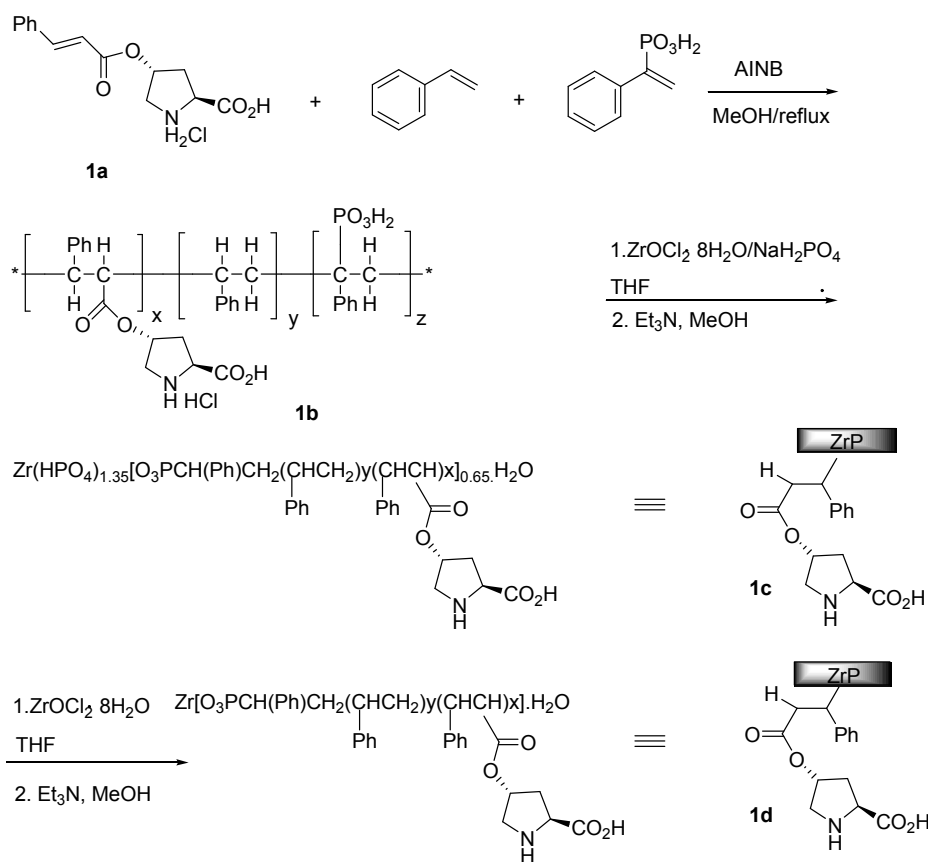

Scheme 1. Synthesis of catalyst **1**.

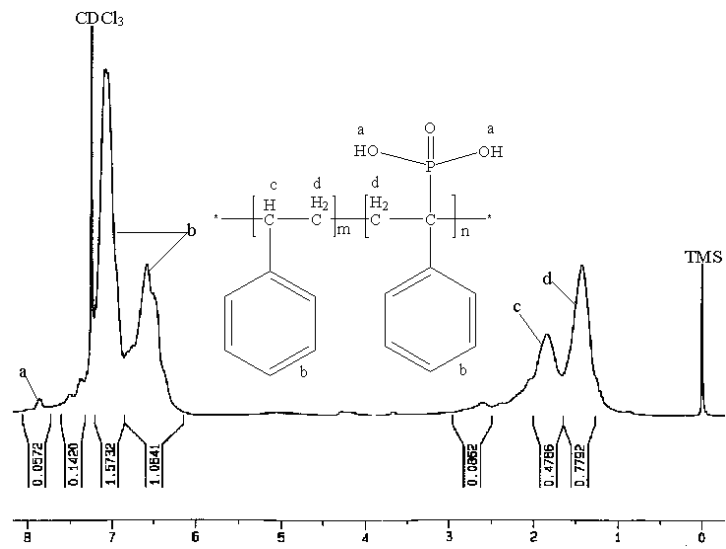

$^1\text{H}$  NMR of copolymer

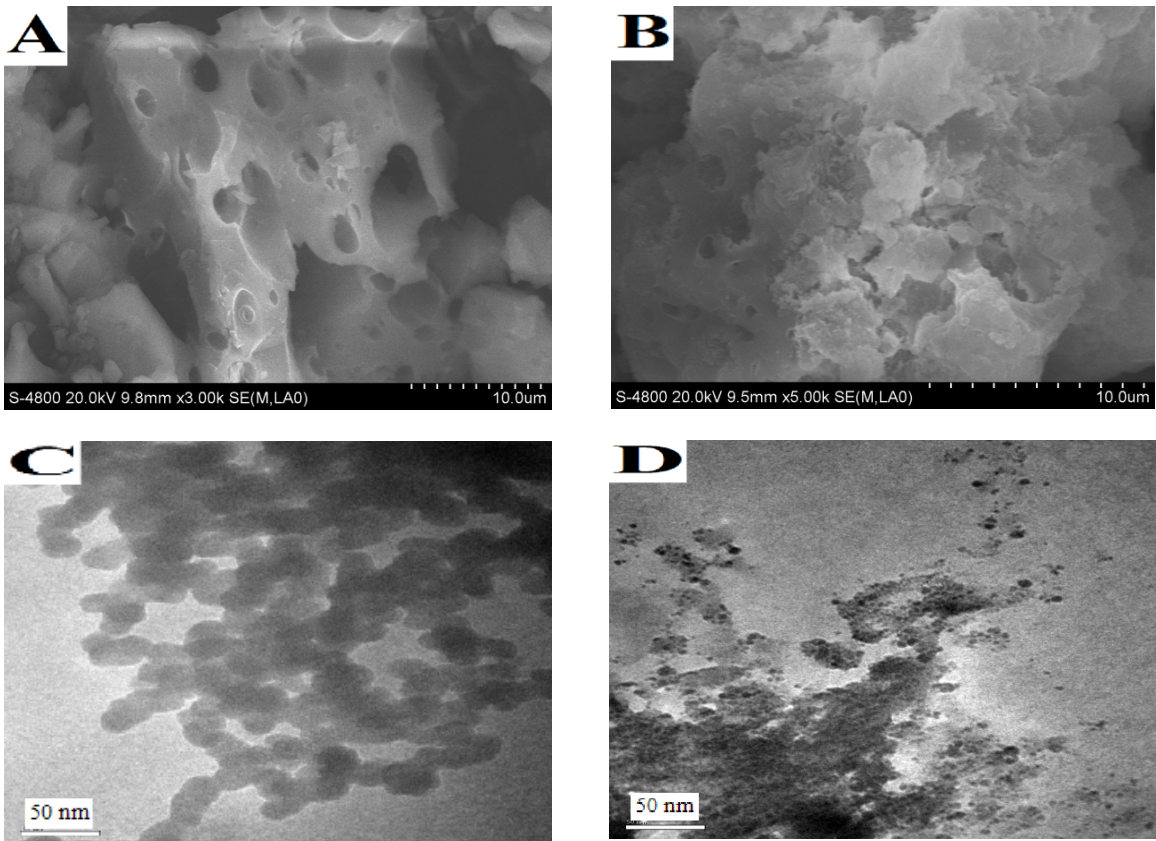

**Figure 2.** SEM and TEM analysis of catalyst **1**.

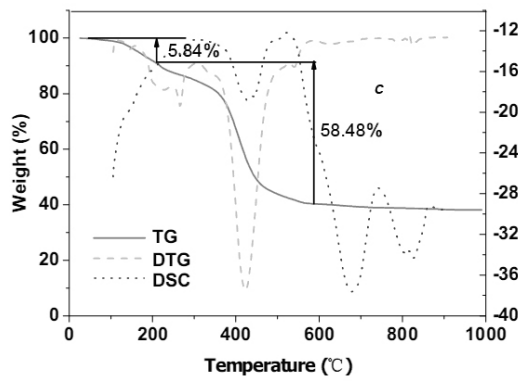

**Figure 3.** The TG curves of the catalyst.

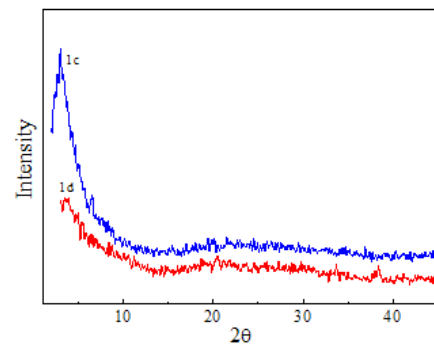

**Figure 4.** XRD pattern of the catalyst **1**.

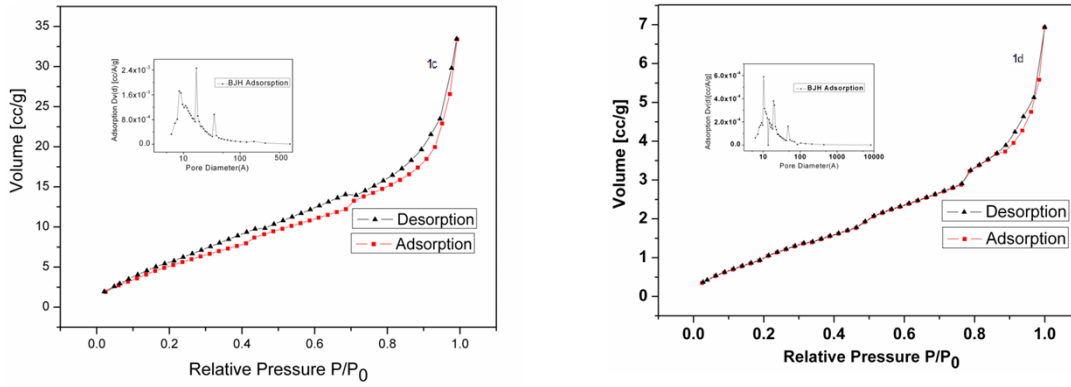

Figure 5. N<sub>2</sub> adsorption-desorption analysis of catalyst 1.

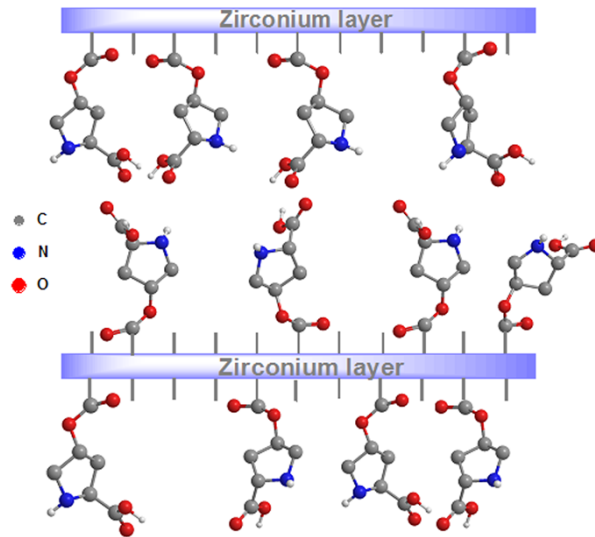

Figure 1. The ideal structure model of ZrPS-PVPA-Pr

**(2S, 10R)-2-[Hydroxy(4-nitrophenyl)methyl]cyclohexan-1-one (2):<sup>1</sup>**

Yield: 98%; *anti/syn* = 98:2, enantiomeric excess: 99% (*anti* diastereomer) determined by HPLC (Daicel Chiralpak AD-H column; *i*-PrOH/hexane = 20:80; 0.5 mL/min; 20 °C;  $\lambda$  = 254 nm)  $t_R$  = 42.5 min (*anti*, major) and  $t_R$  = 32.8 min (*anti*, minor).

**(2S, 10R)-2-[Hydroxy(2-nitrophenyl)methyl]cyclohexan-1-one (3):<sup>1</sup>**

Yield: 9%; *anti/syn* = 99:1, enantiomeric excess: 99% (*anti* diastereomer) determined by HPLC (Daicel Chiralpak OD-H column; *i*-PrOH/hexane = 5:95; 0.5 mL/min; 20 °C;  $\lambda$  = 254 nm)  $t_R$  = 41.9 min (*anti*, major) and  $t_R$  = 50.7 min (*anti*, minor).

**(2S, 10R)-2-[Hydroxy(3-nitrophenyl)methyl]cyclohexan-1-one (4):<sup>1</sup>**

Yield: 97%; *anti/syn* = 97:3, enantiomeric excess: 99% (*anti* diastereomer) determined by HPLC (Daicel Chiralpak AD-H column; *i*-PrOH/hexane = 20:80; 0.5 mL/min; 20 °C;  $\lambda$  = 254 nm)  $t_R$  = 41.9 min (*anti*, major) and  $t_R$  = 32.4 min (*anti*, minor).

**(2S, 10R)-2-[(4-Cyanophenyl)hydroxymethyl]cyclohexan-1-one (5):<sup>1</sup>**

Yield: 97%; *anti:syn* = 97:3, enantiomeric excess: 98% (*anti* diastereomer) determined by HPLC (Daicel Chiralpak AD-H column; *i*-PrOH/hexane = 20:80; 0.5 mL/min; 20 °C;  $\lambda$  = 254 nm)  $t_R$  = 22.5 min (*anti*, major) and  $t_R$  = 18.1 min (*anti*, minor).

**(2S, 10R)-2-{Hydroxy[4-(trifluoromethyl)methyl]}cyclohexan-1-one (6):<sup>1</sup>**

Yield: 98%; *anti/syn* = 98:2, enantiomeric excess: 97% (*anti* diastereomer) determined by HPLC (Daicel Chiralpak AD-H column; *i*-PrOH/hexane = 10:90; 0.5 mL/min, 20 °C,  $\lambda$  = 254 nm)  $t_R$  = 34.4 min (*anti*, major) and  $t_R$  = 26.9 min (*anti*, minor).

**(2S, 10R)-2-[(4-Bromophenyl)hydroxymethyl]cyclohexan-1-one (7):**<sup>1</sup>

Yield: 95%; *anti/syn* = 97:3, enantiomeric excess: 98% (*anti* diastereomer) determined by HPLC (Daicel Chiralpak AD-H column; *i*-PrOH/hexane = 10:90; 0.5 mL/min, 20 °C,  $\lambda$  = 220 nm)  $t_R$  = 43.1 min (*anti*, major) and  $t_R$  = 35.5 min (*anti*, minor).

**(2S, 10R)-2-[(4-Chlorophenyl)hydroxymethyl]cyclohexan-1-one (8):**<sup>1</sup>

Yield: 96%; *anti/syn* = 98:2, enantiomeric excess: 99% (*anti* diastereomer) determined by HPLC (Daicel Chiralpak AD-H column; *i*-PrOH/hexane = 10:90; 0.5 mL/min, 20 °C,  $\lambda$  = 221 nm)  $t_R$  = 39.2 min (*anti*, major) and  $t_R$  = 33.4 min (*anti*, minor).

**(2S, 10R)-2-[(2-Chlorophenyl)hydroxymethyl]cyclohexan-1-one (9):**<sup>1</sup>

Yield: 95%; *anti/syn* = 96:4, enantiomeric excess: 99% (*anti* diastereomer) determined by HPLC (Daicel Chiralpak OD-H column; *i*-PrOH/hexane = 5:95; 1.0 mL/min, 20 °C,  $\lambda$  = 221 nm)  $t_R$  = 9.7 min (*anti*, major) and  $t_R$  = 12.3 min (*anti*, minor).

**(2S, 10R)-2-[(3-Chlorophenyl)hydroxymethyl]cyclohexan-1-one (10):**<sup>1</sup>

Yield: 92%; *anti/syn* = 94:6, enantiomeric excess: 98% (*anti* diastereomer) determined by HPLC (Daicel Chiralpak OD-H column; *i*-PrOH/hexane = 5:95; 1.0 mL/min, 20 °C,  $\lambda$  = 221 nm)  $t_R$  = 9.7 min (*anti*, major) and  $t_R$  = 12.3 min (*anti*, minor).

**(2S, 10R)-2-(Hydroxy-(4-fluor-phenyl)methyl)cyclohexan-1-one (11):**<sup>1</sup>

Yield: 95%; *anti/syn* = 96:4, enantiomeric excess: 98% (*anti* diastereomer) determined by HPLC (Daicel Chiralpak AD-H column; *i*-PrOH/Hexane = 5:95; flow rate 1.0 mL/min, 20 °C,  $\lambda$  = 221 nm;  $t_R$  = 28.3 min (*anti*, major),  $t_R$  = 24.7 min (*anti*, minor)).

**(2*S*, 10*R*)-2-[Hydroxy(4-methoxyphenyl)methyl]cyclohexan-1-one (12):**<sup>1</sup>

Yield: 84%; *anti/syn* = 93:7, enantiomeric excess: 96% (*anti* diastereomer) determined by HPLC (Daicel Chiralpak AD-H column; *i*-PrOH/hexane = 10:90; 0.8 mL/min, 20 °C,  $\lambda$  = 221 nm)  $t_R$  = 32.5 min (*anti*, major) and  $t_R$  = 30.8 min (*anti*, minor).

**(2*S*, 10*R*)-2-[Hydroxy(3-methoxyphenyl)methyl]cyclohexan-1-one (13):**<sup>1</sup>

Yield: 85%; *anti/syn* = 94:6, enantiomeric excess: 97% (*anti* diastereomer) determined by HPLC (Daicel Chiralpak AD-H column; *i*-PrOH/hexane = 10:90; 0.5 mL/min, 20 °C,  $\lambda$  = 221 nm)  $t_R$  = 56.3 min (*anti*, major) and  $t_R$  = 51.1 min (*anti*, minor).

**(2*S*, 10*R*)-2-[Hydroxy(2-naphthyl)methyl]cyclohexan-1-one (14):**<sup>1</sup>

Yield: 86%; *anti/syn* = 94:6, enantiomeric excess: 94% (*anti* diastereomer) determined by HPLC (Daicel Chiralpak OD-H column; *i*-PrOH/hexane = 10:90; 1.0 mL/min, 20 °C,  $\lambda$  = 221 nm)  $t_R$  = 15.7 min (*anti*, major) and  $t_R$  = 22.2 min (*anti*, minor).

**(2*S*, 10*R*)-2-[Hydroxy(1-naphthyl)methyl]cyclohexan-1-one (15):**<sup>1</sup>

Yield: 87%; *anti/syn* = 95:5, enantiomeric excess: 97% (*anti* diastereomer) determined by HPLC (Daicel Chiralpak AD-H column; *i*-PrOH/hexane = 5:95; 1.0 mL/min, 20 °C,  $\lambda$  = 254 nm)  $t_R$  = 45.9 min (*anti*, major) and  $t_R$  = 36.7 min (*anti*, minor).

**(2*S*, 10*R*)-2-[Hydroxy(phenyl)methyl]cyclohexan-1-one (16):**<sup>1</sup>

Yield: 85%; *anti/syn* = 92:8, enantiomeric excess: 93% (*anti* diastereomer) determined by HPLC (Daicel Chiralpak OD-H column; *i*-PrOH/hexane = 10:90; 0.5 mL/min, 20 °C,  $\lambda$  = 220 nm)  $t_R$  = 19.6 min (*anti*, major) and  $t_R$  = 30.6 min (*anti*, minor).

1 (a) C. L. Wu, X. K. Fu, X. B. Ma, S. Li. *Tetrahedron: Asymmetry*. 2010, **21**, 2465-2470.

(b) C. L. Wu, X. K. Fu, S. Li. *Eur. J. Org. Chem.* 2011, **7**, 1291–1299

(c) C. L. Wu, X. K. Fu, S. Li. *Tetrahedron*. 2011, **67**, 4283-4290

(d) C. L. Wu, X. K. Fu, S. Li. *Tetrahedron: Asymmetry*. 2011, **22**, 1063-1073.
